# Supplementary material for: Patient factors associated with novel NAIL-Q scales in toenail onychomycosis or onychocryptosis: a cross-sectional study and regression analysis
Source: Research Square preprint supplement (doi:10.21203/rs.3.rs-7004956/v1), 2025-09-24
Supplement: Supplementary file 1 [file 5036d60ae1bd5b611b09f57b.docx]

**File: Supplementary Table 1**

**Article title:** Patient factors associated with novel NAIL-Q scales in toenail onychomycosis or onychocryptosis: a cross-sectional study and regression analysis

**Journal name:** Archives of Dermatological Research

**Authors:** Samantha Keow BSc1, Charlene Rae PhD2, Lucas Gallo MD, PhD1,3, Shari R. Lipner MD, PhD4, Maureen O’Malley MD5, Anne Klassen PhD2

1Michael G. DeGroote School of Medicine, McMaster University, Hamilton, Ontario, Canada

2Department of Pediatrics, McMaster University, Hamilton, Ontario, Canada

3Division of Plastic Surgery, McMaster University, Hamilton, ON, Canada

4Department of Dermatology, Weill Cornell Medicine, New York City, NY, USA

5Division of Dermatology, McMaster University, Hamilton, Ontario, Canada

**Corresponding author:** Anne Klassen**,** aklass@mcmaster.ca

**Mendeley Supplementary Table 1: Specific treatment status of participants**

|  |  | **Total** | | **Onychomycosis** | | **Onychocryptosis** | |
| --- | --- | --- | --- | --- | --- | --- | --- |
| **Variable** |  | **N** | **%** | **N** | **%** | **N** | **%** |
| Topical treatment status | Don’t Need | 116 | 32 | 13 | 8.7 | 105 | 45.7 |
| Need | 75 | 21 | 48 | 32.0 | 32 | 13.9 |
| Completed | 169 | 47 | 89 | 59.3 | 93 | 40.4 |
| Oral treatment status | Don’t Need | 237 | 66 | 77 | 51.3 | 171 | 74.3 |
| Need | 54 | 15 | 40 | 26.7 | 18 | 7.8 |
| Completed | 69 | 19 | 33 | 22.0 | 41 | 17.8 |
| Surgery treatment status | Don’t Need | 258 | 72 | 126 | 84.0 | 144 | 62.6 |
| Need | 53 | 15 | 16 | 10.7 | 39 | 17.0 |
| Completed | 49 | 14 | 8 | 5.3 | 47 | 20.4 |
| Taping treatment status | Don’t Need | 311 | 86 | 139 | 92.7 | 190 | 82.6 |
| Need | 27 | 8 | 7 | 4.7 | 21 | 9.1 |
| Completed | 22 | 6 | 4 | 2.7 | 19 | 8.3 |
| Clipping treatment status | Don’t Need | 154 | 43 | 95 | 63.3 | 69 | 30.0 |
| Need | 99 | 28 | 29 | 19.3 | 74 | 32.2 |
